# Supplementary material
Source: MDPI journal article supplement (https://www.mdpi.com/2073-8994/14/6/1262)
Supplement: s1 [file s1]

# A scent of peppermint – a microwave spectroscopy analysis on the composition of peppermint oil

Anna Krin<sup>a,b</sup>, María Mar Quesada Moreno<sup>a,b,1</sup>, Cristóbal Pérez<sup>a,b,2</sup>, Melanie Schnell<sup>a,b</sup>

<sup>a</sup>*Deutsches Elektronen-Synchrotron DESY, Notkestr. 85, 22607 Hamburg, Germany.*

*E-mail: melanie.schnell@desy.de*

<sup>b</sup>*Institute of Physical Chemistry, Christian-Albrechts-Universität zu Kiel, Max-Eyth-Str. 1, 24118 Kiel, Germany*

---

---

## List of Tables

|    |                                                                                                     |   |
|----|-----------------------------------------------------------------------------------------------------|---|
| S1 | Experimentally determined rotational constants for the isotopic species of menthol EQ1ext . . . . . | 2 |
| S2 | Experimental and calculated atomic coordinates of menthol EQ1ext                                    | 3 |
| S3 | Experimental and calculated structural parameters of menthol EQ1ext . . . . .                       | 4 |
| S4 | Experimentally determined rotational constants for the isotopic species of menthone B. . . . .      | 5 |
| S5 | Experimental and calculated atomic coordinates of menthone B .                                      | 6 |
| S6 | Experimental and calculated structural parameters of menthone B                                     | 7 |
| S7 | Measured rotational transitions and the residuals of menthol EQ3ext                                 | 8 |

---

<sup>1</sup> Present address: Departamento de Química Inorgánica, Facultad de Ciencias, Universidad de Granada, Avda. Fuentenueva s/n, 18071, Granada, Spain. <sup>2</sup> Present address: Departamento de Química Física y Química Inorgánica, Facultad de Ciencias-I.U. CINQUIMA, Universidad de Valladolid, E-47011 Valladolid, Spain.

Table S1: Experimentally determined rotational constants for the parent and the  $^{13}\text{C}$  singly substituted isotopologues of the lowest energy conformer of menthol EQ1text

|                      | parent           | $^{13}\text{C1}$      | $^{13}\text{C2}$  | $^{13}\text{C3}$ |
|----------------------|------------------|-----------------------|-------------------|------------------|
| A / MHz              | 1779.79549(38)   | 1778.520(21)          | 1766.036(32)      | 1767.551(35)     |
| B / MHz              | 692.62171(24)    | 687.83895(38)         | 690.62144(55)     | 692.60182(65)    |
| C / MHz              | 573.34542(27)    | 570.10533(38)         | 570.57274(57)     | 572.10424(65)    |
| $\Delta_J$ / kHz     | 0.0166(31)       | [0.0166] <sup>a</sup> | [0.0166]          | [0.0166]         |
| $N_{\text{lines}}^a$ | 53               | 18                    | 15                | 18               |
| $\sigma$ / kHz       | 5.5              | 4.5                   | 6.2               | 7.6              |
|                      | $^{13}\text{C4}$ | $^{13}\text{C5}$      | $^{13}\text{C6}$  | $^{13}\text{C7}$ |
| A / MHz              | 1778.999(32)     | 1772.165(20)          | 1773.397(40)      | 1779.066(19)     |
| B / MHz              | 692.09869(58)    | 692.60432(35)         | 690.24117(64)     | 679.85356(31)    |
| C / MHz              | 573.07264(55)    | 572.57490(34)         | 571.08109(62)     | 564.49456(30)    |
| $\Delta_J$ / kHz     | [0.0166]         | [0.0166]              | [0.0166]          | [0.0166]         |
| $N_{\text{lines}}^a$ | 16               | 16                    | 14                | 16               |
| $\sigma$ / kHz       | 6.0              | 4.0                   | 6.8               | 3.4              |
|                      | $^{13}\text{C8}$ | $^{13}\text{C9}$      | $^{13}\text{C10}$ |                  |
| A / MHz              | 1779.760(15)     | 1768.555(27)          | 1767.8522(51)     |                  |
| B / MHz              | 688.10319(25)    | 684.62415(41)         | 683.66536(33)     |                  |
| C / MHz              | 570.25610(26)    | 569.01801(42)         | 566.99232(28)     |                  |
| $\Delta_J$ / kHz     | [0.0166]         | [0.0166]              | [0.0166]          |                  |
| $N_{\text{lines}}^b$ | 17               | 17                    | 21                |                  |
| $\sigma$ / kHz       | 3.0              | 4.9                   | 4.8               |                  |

<sup>a</sup> fixed to the value determined for the parent species.

<sup>b</sup> number of rotational transitions in the fit.

Table S2:  $r_s$  structure,  $x$ ,  $y$  and  $z$  coordinates of the isotopically substituted atoms of menthol EQ1ext, and their comparison with  $r_0$ ,  $r_e$  (B3LYP/def2-TZVPP) structures. All coordinates are in Å.

|       | atom | $x$                  | $y$                  | $z$                 |
|-------|------|----------------------|----------------------|---------------------|
| $r_s$ | C1   | 2.22553(78)          | −0.2660(65)          | 0.3680(47)          |
| $r_0$ |      | 2.2291(18)           | −0.267(14)           | 0.3795(85)          |
| $r_e$ |      | 2.228                | −0.227               | 0.383               |
| $r_s$ | C2   | 1.4451(14)           | −1.4859(14)          | −0.147(14)          |
| $r_0$ |      | 1.4511(29)           | −1.4878(31)          | −0.1517(63)         |
| $r_e$ |      | 1.446                | −1.471               | −0.044              |
| $r_s$ | C3   | −0.130 <i>i</i> (16) | −1.3909(15)          | 0.196(11)           |
| $r_0$ |      | −0.045(19)           | −1.3951(27)          | 0.1913(87)          |
| $r_e$ |      | −0.043               | −1.346               | 0.276               |
| $r_s$ | C4   | −0.6505(31)          | −0.048 <i>i</i> (41) | −0.3605(55)         |
| $r_0$ |      | −0.6663(45)          | −0.097(12)           | −0.3627(30)         |
| $r_e$ |      | −0.671               | −0.101               | −0.367              |
| $r_s$ | C5   | 0.095 <i>i</i> (18)  | 1.0948(16)           | 0.166(10)           |
| $r_0$ |      | 0.1070(63)           | 1.0991(27)           | 0.1973(60)          |
| $r_e$ |      | 0.103                | 1.140                | 0.079               |
| $r_s$ | C6   | 1.5820(14)           | 1.0050(22)           | −0.153(15)          |
| $r_0$ |      | 1.5820(26)           | 1.0098(47)           | −0.203(18)          |
| $r_e$ |      | 1.591                | 1.016                | −0.241              |
| $r_s$ | C7   | 3.70705(46)          | −0.3474(49)          | 0.017 <i>i</i> (98) |
| $r_0$ |      | 3.7091(11)           | −0.3633(90)          | 0.0100(85)          |
| $r_e$ |      | 3.709                | −0.335               | 0.030               |
| $r_s$ | C8   | −2.18977(74)         | 0.073 <i>i</i> (22)  | −0.105(15)          |
| $r_0$ |      | −2.1927(17)          | 0.0281(99)           | −0.1396(80)         |
| $r_e$ |      | −2.194               | 0.029                | −0.143              |
| $r_s$ | C9   | −2.59065(72)         | 0.088 <i>i</i> (21)  | 1.3558(14)          |
| $r_0$ |      | −2.5932(17)          | 0.059(23)            | 1.3582(27)          |
| $r_e$ |      | −2.598               | 0.102                | 1.332               |
| $r_s$ | C10  | −2.95832(52)         | −1.0665(14)          | −0.9058(17)         |
| $r_0$ |      | −2.9629(16)          | −1.0651(46)          | −0.9036(37)         |
| $r_e$ |      | −2.962               | −1.087               | −0.856              |

Table S3: Structural parameters obtained from  $r_0$  and  $r_s$  fits in comparison to the computationally determined values  $r_e$  structure, (B3LYP-D3/def2-TZVPP) for menthol conformer EQ1ext.

|                     | $r_s$       | $r_0$      | $r_e$   |
|---------------------|-------------|------------|---------|
| r(C1-C2) / Å        | 1.5370(72)  | 1.544(15)  | 1.53    |
| r(C2-C3) / Å        | 1.4882(42)  | 1.525(20)  | 1.53    |
| r(C3-C4) / Å        | 1.6332(45)  | 1.548(14)  | 1.54    |
| r(C4-C5) / Å        | 1.3782(49)  | 1.526(14)  | 1.53    |
| r(C5-C6) / Å        | 1.6141(38)  | 1.5305(86) | 1.53    |
| r(C1-C6) / Å        | 1.5178(79)  | [1.53]     | 1.53    |
| r(C1-C7) / Å        | 1.5287(15)  | 1.5332(44) | 1.53    |
| r(C4-C8) / Å        | 1.5603(41)  | 1.5497(53) | 1.55    |
| r(C8-C9) / Å        | 1.515 (15)  | 1.5487(84) | 1.53    |
| r(C8-C10) / Å       | 1.5393(82)  | 1.5415(60) | 1.53    |
| ∠(C1-C2-C3) / °     | 111.42(49)  | 111.46(40) | 111.90  |
| ∠(C2-C3-C4) / °     | 111.26(43)  | 111.56(48) | 112.16  |
| ∠(C3-C4-C5) / °     | 110.99(40)  | [109.20]   | 109.20  |
| ∠(C4-C5-C6) / °     | 110.01(44)  | 110.39(54) | 111.47  |
| ∠(C5-C6-C1) / °     | 113.28(49)  | [112.69]   | 112.69  |
| ∠(C6-C1-C2) / °     | 109.49(41)  | [109.49]   | 109.49  |
| ∠(C7-C1-C2) / °     | 111.67(43)  | 111(1)     | 111.95  |
| ∠(C7-C1-C6) / °     | 111.99(43)  | [111.53]   | 111.53  |
| ∠(C5-C4-C8) / °     | 113.77(38)  | [112.86]   | 112.86  |
| ∠(C3-C4-C8) / °     | 109.71(31)  | [114.25]   | 114.25  |
| ∠(C4-C8-C10) / °    | 114.04(62)  | [111.45]   | 111.45  |
| ∠(C4-C8-C9) / °     | 114.77(74)  | 113.19(38) | 113.82  |
| ∠(C9-C8-C10) / °    | 111.69(38)  | [110.55]   | 110.55  |
| ∠(C7-C1-C2-C3) / °  | -179.12(66) | [-178.47]  | -178.47 |
| ∠(C7-C1-C6-C5) / °  | 177.65(65)  | [179.22]   | 179.22  |
| ∠(C1-C2-C3-C4) / °  | 55(1)       | [56.52]    | 56.52   |
| ∠(C1-C6-C5-C4) / °  | -57(1)      | [-56.77]   | -56.77  |
| ∠(C2-C3-C4-C8) / °  | 174.51(85)  | [176.61]   | 176.61  |
| ∠(C3-C4-C8-C9) / °  | 64.76(47)   | 57.87(82)  | 59.55   |
| ∠(C3-C4-C8-C10) / ° | -65.89(97)  | -64.71(79) | -66.30  |
| ∠(C5-C4-C3-C2) / °  | -58.91(93)  | [-55.94]   | -55.94  |
| ∠(C6-C5-C4-C3) / °  | 55.86(88)   | 58.26(99)  | 55.59   |
| ∠(C5-C4-C8-C9) / °  | -60.23(54)  | [-65.99]   | -65.99  |
| ∠(C5-C4-C8-C10) / ° | 169.12(65)  | [168.15]   | 168.15  |

The distances and angles, which involve C3, C4, C5, C7, C8, and C9 atoms. have been calculated by setting the imaginary  $r_s$  coordinates to zero.

Table S4: Experimentally determined rotational constants for the isotopic species of menthone B.

|                      | parent            | $^{13}\text{C}2$      | $^{13}\text{C}3$  | $^{13}\text{C}4$ |
|----------------------|-------------------|-----------------------|-------------------|------------------|
| A / MHz              | 2021.98637(366)   | 2013.2668(88)         | 2021.1247(17)     | 2005.1551(48)    |
| B / MHz              | 693.53686(16)     | 693.54403(89)         | 693.04103(49)     | 693.40011(47)    |
| C / MHz              | 562.13636(16)     | 561.47905(71)         | 561.82736(39)     | 560.92983(35)    |
| $\Delta_J$ / kHz     | 0.0109(18)        | [0.0109] <sup>a</sup> | [0.0109]          | [0.0109]         |
| $\Delta_{JK}$ / kHz  | 0.0473(50)        | [0.0473]              | [0.0473]          | [0.0473]         |
| $N_{\text{lines}}^b$ | 112               | 7                     | 12                | 13               |
| $\sigma$ / kHz       | 6.0               | 6.4                   | 7.6               | 5.5              |
|                      | $^{13}\text{C}5$  | $^{13}\text{C}6$      | $^{13}\text{C}7$  | $^{13}\text{C}8$ |
| A / MHz              | 2005.7371(45)     | 2021.5275(45)         | 2011.79560(82)    | 2021.6409(34)    |
| B / MHz              | 691.27977(43)     | 688.59370(41)         | 691.24026(28)     | 689.05149(40)    |
| C / MHz              | 559.39771(30)     | 558.90281(30)         | 560.04132(20)     | 559.19980(25)    |
| $\Delta_J$ / kHz     | [0.0109]          | [0.0109]              | [0.0109]          | [0.0109]         |
| $\Delta_{JK}$ / kHz  | [0.0473]          | [0.0473]              | [0.0473]          | [0.0473]         |
| $N_{\text{lines}}^b$ | 10                | 11                    | 12                | 12               |
| $\sigma$ / kHz       | 4.1               | 4.1                   | 3.6               | 3.7              |
|                      | $^{13}\text{C}10$ | $^{13}\text{C}11$     | $^{13}\text{C}12$ |                  |
| A / MHz              | 2012.1098(48)     | 2004.821(19)          | 2021.178(11)      |                  |
| B / MHz              | 685.08386(44)     | 685.6815(11)          | 680.5527(14)      |                  |
| C / MHz              | 556.38999(35)     | 555.5508(13)          | 553.60823(87)     |                  |
| $\Delta_J$ / kHz     | [0.0109]          | [0.0109]              | [0.0109]          |                  |
| $\Delta_{JK}$ / kHz  | [0.0473]          | [0.0473]              | [0.0473]          |                  |
| $N_{\text{lines}}^b$ | 14                | 6                     | 11                |                  |
| $\sigma$ / kHz       | 5.6               | 8.1                   | 11.8              |                  |

<sup>a</sup> fixed to the value determined for the parent species.

<sup>b</sup> number of rotational transitions in the fit.

Table S5:  $r_s$  structure,  $x$ ,  $y$  and  $z$  coordinates of the isotopically substituted atoms of menthone B, and their comparison with  $r_0$ ,  $r_e$  (B3LYP/def2-TZVPP) structures. All coordinates are in Å.

| atom  |     | $x$                 | $y$          | $z$                  |
|-------|-----|---------------------|--------------|----------------------|
| $r_s$ | C2  | 0.137 <i>i</i> (11) | 1.0366(15)   | −0.107(15)           |
| $r_0$ |     | 0.049(10)           | 1.0432(53)   | −0.0732(55)          |
| $r_e$ |     | 0.081               | 1.093        | −0.115               |
| $r_s$ | C3  | −0.6752(23)         | −0.1999(76)  | 0.2588(59)           |
| $r_0$ |     | −0.7094(99)         | −0.204(24)   | 0.2532(61)           |
| $r_e$ |     | −0.705              | −0.169       | 0.231                |
| $r_s$ | C4  | 0.101 <i>i</i> (15) | −1.3958(11)  | −0.3953(39)          |
| $r_0$ |     | 0.102(21)           | −1.3927(80)  | −0.425(19)           |
| $r_e$ |     | 0.076               | −1.358       | −0.377               |
| $r_s$ | C5  | 1.54116(98)         | −1.4282(11)  | 0.037(41)            |
| $r_0$ |     | 1.5431(70)          | −1.4370(76)  | 0.050(14)            |
| $r_e$ |     | 1.532               | −1.395       | 0.084                |
| $r_s$ | C6  | 2.28111(67)         | −0.117(13)   | −0.2090(73)          |
| $r_0$ |     | 2.2862(45)          | −0.0951(92)  | −0.206(12)           |
| $r_e$ |     | 2.285               | −0.102       | −0.230               |
| $r_s$ | C7  | 1.5034(10)          | 1.0544(14)   | 0.4051(37)           |
| $r_0$ |     | 1.5007(72)          | 1.066(10)    | 0.441(19)            |
| $r_e$ |     | 1.519               | 1.099        | 0.358                |
| $r_s$ | C8  | −2.17376(70)        | −0.0.102(15) | −0.1812(84)          |
| $r_0$ |     | −2.1802(48)         | −0.130(36)   | −0.142(16)           |
| $r_e$ |     | −2.182              | −0.082       | −0.181               |
| $r_s$ | C10 | −2.92087(9)         | 0.8799(17)   | 0.6900(22)           |
| $r_0$ |     | −2.9219(40)         | 0.886(14)    | 0.708(13)            |
| $r_e$ |     | −2.920              | 0.953        | 0.675                |
| $r_s$ | C11 | −2.90183(60)        | −1.5072(12)  | −0.295 <i>i</i> (60) |
| $r_0$ |     | −2.8995(40)         | −1.5025(79)  | −0.054(16)           |
| $r_e$ |     | −2.902              | −1.430       | −0.097               |
| $r_s$ | C12 | 3.72379(44)         | −0.155(11)   | 0.2804(58)           |
| $r_0$ |     | 3.72624(29)         | −0.1363(99)  | 0.303(19)            |
| $r_e$ |     | 3.726               | −0.136       | 0.269                |

Table S6: Structural parameters obtained from  $r_0$  and  $r_s$  fits in comparison to the computationally determined values ( $r_e$  structure, B3LYP-D3/def2-TZVPP) for menthone B.

|                     | $r_0$       | $r_s$       | $r_e$   |
|---------------------|-------------|-------------|---------|
| r(C2-C3) / Å        | 1.4555(78)  | 1.496(25)   | 1.53    |
| r(C3-C4) / Å        | 1.5211(68)  | 1.591(26)   | 1.55    |
| r(C4-C5) / Å        | 1.601(11)   | 1.518(21)   | 1.53    |
| r(C5-C6) / Å        | 1.5255(13)  | 1.555(13)   | 1.53    |
| r(C6-C7) / Å        | 1.534(10)   | [1.54]      | 1.54    |
| r(C2-C7) / Å        | 1.5882(50)  | 1.540(12)   | 1.51    |
| r(C3-C8) / Å        | 1.5649(38)  | 1.5247(14)  | 1.54    |
| r(C8-C10) / Å       | 1.510(11)   | 1.519(21)   | 1.53    |
| r(C8-C11) / Å       | 1.5933(12)  | 1.552(34)   | 1.53    |
| r(C6-C12) / Å       | 1.5239(31)  | 1.5279(62)  | 1.53    |
| ∠(C2-C3-C4) / °     | 110.73(41)  | 105.74(64)  | 106.64  |
| ∠(C2-C3-C8) / °     | 108.68(69)  | 113(2)      | 112.80  |
| ∠(C2-C7-C6) / °     | 110.02(38)  | [ 112.80 ]  | 110.48  |
| ∠(C3-C2-C7) / °     | 111.58(51)  | [ 110.48 ]  | 114.93  |
| ∠(C3-C4-C5) / °     | 109.09(82)  | [ 114.93 ]  | 112.41  |
| ∠(C3-C8-C10) / °    | 110.63(65)  | 111(1)      | 110.58  |
| ∠(C3-C8-C11) / °    | 110.50(81)  | 113(3)      | 112.82  |
| ∠(C4-C3-C8) / °     | 110.70(61)  | [ 115.06 ]  | 115.06  |
| ∠(C4-C5-C6) / °     | 114(1)      | 112.13(52)  | 112.77  |
| ∠(C5-C6-C7) / °     | 110.22(78)  | [ 109.63 ]  | 109.63  |
| ∠(C5-C6-C12) / °    | 113(1)      | [ 112.29 ]  | 112.29  |
| ∠(C7-C6-C12) / °    | 111.73(70)  | [ 111.23 ]  | 111.23  |
| ∠(C10-C8-C11) / °   | 106.36(35)  | [ 109.73 ]  | 109.73  |
| ∠(C2-C3-C4-C5) / °  | 57(1)       | 56.76(99)   | 54.73   |
| ∠(C3-C4-C5-C6) / °  | -53(3)      | [ -56.69 ]  | -56.69  |
| ∠(C4-C5-C6-C7) / °  | 51(3)       | [ 54.25 ]   | 54.25   |
| ∠(C4-C5-C6-C12) / ° | 177(2)      | [ 178.42 ]  | 178.42  |
| ∠(C5-C6-C7-C2) / °  | -53(2)      | [ -53.52 ]  | -53.52  |
| ∠(C2-C7-C6-C12) / ° | -178.77(67) | [ -178.31 ] | -178.31 |
| ∠(C2-C3-C8-C10) / ° | -70.86(92)  | -67(3)      | -68.24  |
| ∠(C2-C3-C8-C11) / ° | 171.62(69)  | [ 168.45 ]  | 168.45  |
| ∠(C4-C3-C8-C10) / ° | 167.32(59)  | [ 169.11 ]  | 169.11  |
| ∠(C4-C3-C8-C11) / ° | 49.79(64)   | [ 45.80 ]   | 45.80   |
| ∠(C7-C2-C3-C8) / °  | 175.81(68)  | [ 175.85 ]  | 175.85  |
| ∠(C5-C4-C3-C8) / °  | 178(1)      | [ -179.38 ] | -179.38 |

The distances and angles which involve C2, C4, and C11 atoms have been calculated by setting the imaginary  $r_s$  coordinates to zero.

Table S7: Measured rotational transitions ( $\nu_{\text{obs}}$ ) of menthol EQ3ext and the residuals ( $\nu_{\text{obs}} - \nu_{\text{calc}}$ ) for the fit reported in the manuscript (Table 2).

| $J'$ | $K'_a$ | $K'_c$ | $\leftarrow$ | $J''$ | $K''_a$ | $K''_c$ | $\nu_{\text{obs}}(\text{MHz})$ | $\nu_{\text{obs}} - \nu_{\text{calc}} \text{ (MHz)}$ |
|------|--------|--------|--------------|-------|---------|---------|--------------------------------|------------------------------------------------------|
| 2    | 1      | 2      | $\leftarrow$ | 1     | 1       | 1       | 2411.2536                      | 0.0016                                               |
| 2    | 0      | 2      | $\leftarrow$ | 1     | 0       | 1       | 2499.0660                      | -0.0002                                              |
| 1    | 1      | 0      | $\leftarrow$ | 0     | 0       | 0       | 2634.7531                      | 0.0016                                               |
| 7    | 2      | 6      | $\leftarrow$ | 7     | 1       | 6       | 2791.5643                      | -0.0017                                              |
| 6    | 2      | 5      | $\leftarrow$ | 6     | 1       | 5       | 3079.8118                      | 0.0055                                               |
| 5    | 2      | 4      | $\leftarrow$ | 5     | 1       | 4       | 3336.3109                      | -0.0032                                              |
| 4    | 2      | 3      | $\leftarrow$ | 4     | 1       | 3       | 3555.8358                      | 0.0057                                               |
| 3    | 1      | 3      | $\leftarrow$ | 2     | 1       | 2       | 3613.9429                      | -0.0013                                              |
| 3    | 0      | 3      | $\leftarrow$ | 2     | 0       | 2       | 3736.6601                      | 0.0018                                               |
| 3    | 2      | 1      | $\leftarrow$ | 2     | 2       | 0       | 3774.9677                      | 0.0004                                               |
| 3    | 1      | 2      | $\leftarrow$ | 2     | 1       | 1       | 3891.6573                      | -0.0035                                              |
| 2    | 1      | 1      | $\leftarrow$ | 1     | 0       | 1       | 3979.3134                      | -0.0002                                              |
| 4    | 1      | 4      | $\leftarrow$ | 3     | 1       | 3       | 4813.3304                      | 0.0000                                               |
| 4    | 0      | 4      | $\leftarrow$ | 3     | 0       | 3       | 4960.4090                      | -0.0003                                              |
| 4    | 2      | 3      | $\leftarrow$ | 3     | 2       | 2       | 5004.0012                      | -0.0023                                              |
| 4    | 3      | 2      | $\leftarrow$ | 3     | 3       | 1       | 5016.9198                      | 0.0046                                               |
| 4    | 3      | 1      | $\leftarrow$ | 3     | 3       | 0       | 5017.8477                      | -0.0041                                              |
| 4    | 2      | 2      | $\leftarrow$ | 3     | 2       | 1       | 5051.3342                      | -0.0028                                              |
| 4    | 1      | 3      | $\leftarrow$ | 3     | 1       | 2       | 5182.8909                      | -0.0003                                              |
| 3    | 1      | 2      | $\leftarrow$ | 2     | 0       | 2       | 5371.9101                      | 0.0017                                               |
| 7    | 1      | 6      | $\leftarrow$ | 6     | 2       | 4       | 5615.4148                      | 0.0053                                               |
| 5    | 1      | 5      | $\leftarrow$ | 4     | 1       | 4       | 6008.6579                      | 0.0053                                               |
| 5    | 0      | 5      | $\leftarrow$ | 4     | 0       | 4       | 6167.1730                      | 0.0056                                               |
| 5    | 2      | 4      | $\leftarrow$ | 4     | 2       | 3       | 6248.9950                      | 0.0026                                               |
| 5    | 4      | 1      | $\leftarrow$ | 4     | 4       | 0       | 6270.3961                      | -0.0030                                              |
| 5    | 3      | 3      | $\leftarrow$ | 4     | 3       | 2       | 6274.6271                      | -0.0023                                              |
| 5    | 3      | 2      | $\leftarrow$ | 4     | 3       | 1       | 6277.8926                      | -0.0028                                              |
| 7    | 3      | 5      | $\leftarrow$ | 7     | 2       | 5       | 6281.8869                      | -0.0134                                              |
| 5    | 2      | 3      | $\leftarrow$ | 4     | 2       | 2       | 6341.4689                      | -0.0012                                              |
| 6    | 3      | 4      | $\leftarrow$ | 6     | 2       | 4       | 6448.5530                      | 0.0042                                               |
| 5    | 1      | 4      | $\leftarrow$ | 4     | 1       | 3       | 6468.5044                      | -0.0038                                              |
| 2    | 2      | 0      | $\leftarrow$ | 1     | 1       | 0       | 6471.8686                      | -0.0080                                              |
| 2    | 2      | 1      | $\leftarrow$ | 1     | 1       | 1       | 6559.6958                      | 0.0047                                               |
| 5    | 3      | 3      | $\leftarrow$ | 5     | 2       | 3       | 6560.2156                      | 0.0065                                               |
| 4    | 3      | 2      | $\leftarrow$ | 4     | 2       | 2       | 6627.0433                      | -0.0063                                              |
| 4    | 3      | 1      | $\leftarrow$ | 4     | 2       | 3       | 6699.4451                      | 0.0042                                               |
| 5    | 3      | 2      | $\leftarrow$ | 5     | 2       | 4       | 6728.3464                      | 0.0023                                               |
| 6    | 3      | 3      | $\leftarrow$ | 6     | 2       | 5       | 6780.8723                      | -0.0044                                              |
| 4    | 1      | 3      | $\leftarrow$ | 3     | 0       | 3       | 6818.1424                      | 0.0009                                               |
| 6    | 1      | 6      | $\leftarrow$ | 5     | 1       | 5       | 7199.4210                      | 0.0045                                               |
| 6    | 0      | 6      | $\leftarrow$ | 5     | 0       | 5       | 7355.9167                      | 0.0032                                               |
| 6    | 2      | 5      | $\leftarrow$ | 5     | 2       | 4       | 7490.0096                      | 0.0066                                               |
| 6    | 4      | 3      | $\leftarrow$ | 5     | 4       | 2       | 7527.9067                      | -0.0072                                              |
| 6    | 4      | 2      | $\leftarrow$ | 5     | 4       | 1       | 7528.0545                      | -0.0107                                              |
| 6    | 3      | 4      | $\leftarrow$ | 5     | 3       | 3       | 7533.8818                      | -0.0031                                              |
| 6    | 3      | 3      | $\leftarrow$ | 5     | 3       | 2       | 7542.5314                      | -0.0042                                              |
| 6    | 2      | 4      | $\leftarrow$ | 5     | 2       | 3       | 7645.5469                      | 0.0016                                               |
| 3    | 2      | 1      | $\leftarrow$ | 2     | 1       | 1       | 7650.3481                      | 0.0047                                               |
| 6    | 1      | 5      | $\leftarrow$ | 5     | 1       | 4       | 7746.5114                      | 0.0005                                               |
| 3    | 2      | 2      | $\leftarrow$ | 2     | 1       | 2       | 7904.2593                      | 0.0074                                               |
|      |        |        |              |       |         |         | RMS                            | 4.6 kHz                                              |
